# Supplementary material for: SERINC5 Restricts HIV-1 Infectivity by Promoting Conformational Changes and Accelerating Functional Inactivation of Env
Source: MDPI journal article supplement (doi:10.3390/v14071388), 2022-06-25
Supplement: s1 [file s1]

Fig S1

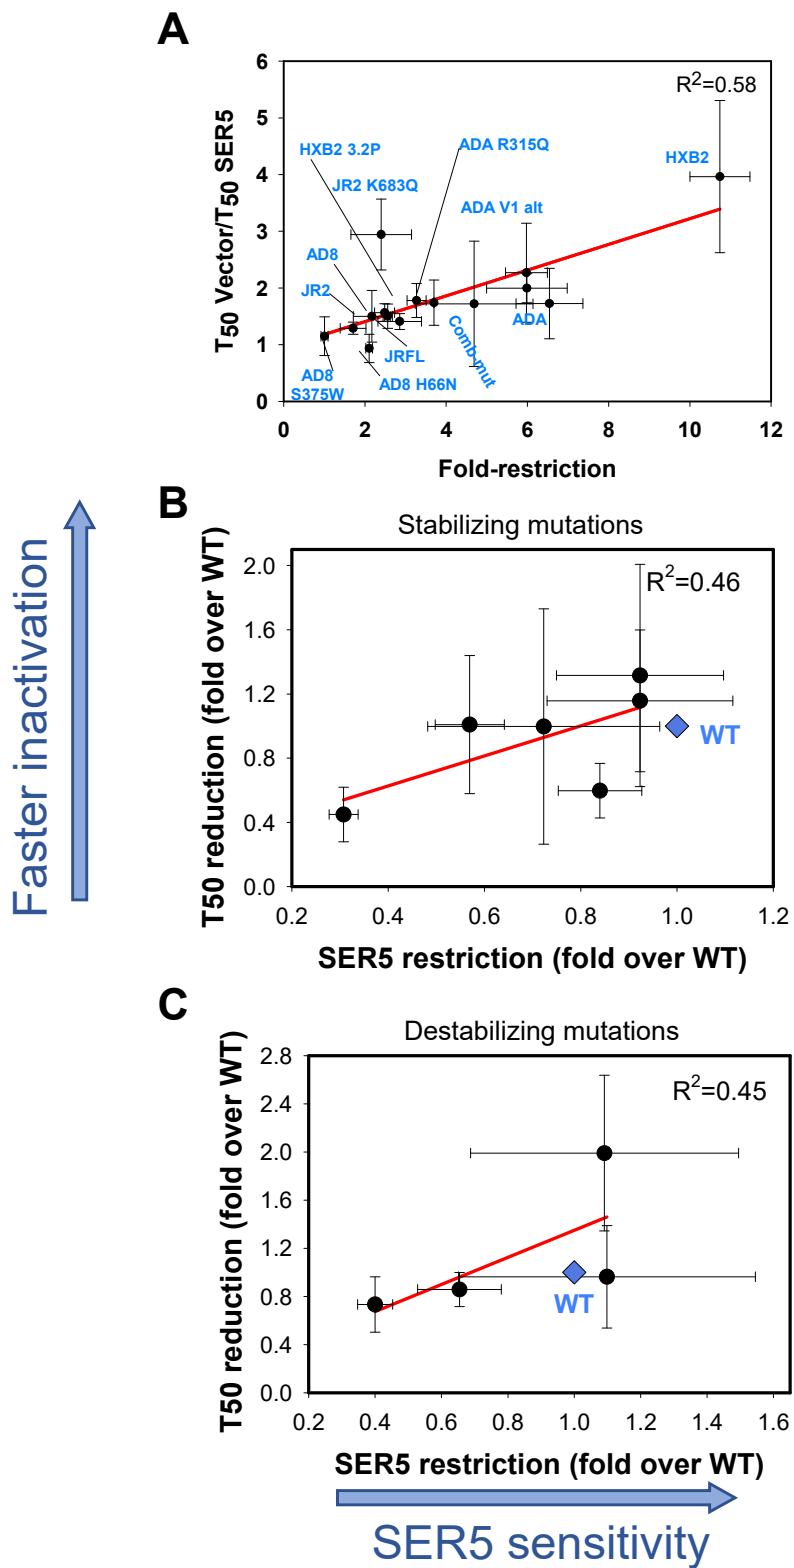

$$T50 \text{ reduction} = \frac{T50_{Vec}^{mut} / T50_{SER5}^{mut}}{T50_{Vec}^{WT} / T50_{SER5}^{WT}}$$

$$SER5 \text{ restriction} = \frac{FR_{Vec}^{mut} / FR_{SER5}^{mut}}{FR_{Vec}^{WT} / FR_{SER5}^{WT}}$$

**Figure S1. Correlation between the rates of spontaneous inactivation and fold-restriction by SER5 for wild-type and mutant HIV-1 Envs. (A)** Scatter plot showing SER5-mediated acceleration of Env inactivation ( $T_{50}^{\text{Vector}}/T_{50}^{\text{SER5}}$ ) vs SER5 fold-restriction for 5 wild-type (WT) Envs and 10 Env mutants. A linear regression is shown by red line. The data are means and S.D. of 2 to 4 independent experiments, each performed in triplicate. The values of  $T_{50}$  ratio, fold-restriction, and the numbers of independent experiments are listed in Table S1. (B) and (C) Scatter plots of the fold- $T_{50}$  reduction by SER5 vs SER5 restriction for HIV-1 Envs containing stabilizing mutations (B) or destabilizing mutations (C). For the combined scatter plot for all mutations, see Fig. 2B. The WT values across different Env strains were set to 1 (blue symbol). The red line is linear regression. The blue arrows along the axes show shifts from the regression line corresponding to SER5 sensitization. Data are means and S.D. from 2 to 4 independent experiments, each performed in triplicate. The number of experiments,  $T_{50}$  ratio, and fold-restriction values are listed in Table S1. The formulas used to calculate the values plotted in A and B are given below the graphs. Abbreviations: *Vec*, vector, *mut*, mutant, WT, wild-type, and FR, fold-restriction.

**Fig S2**

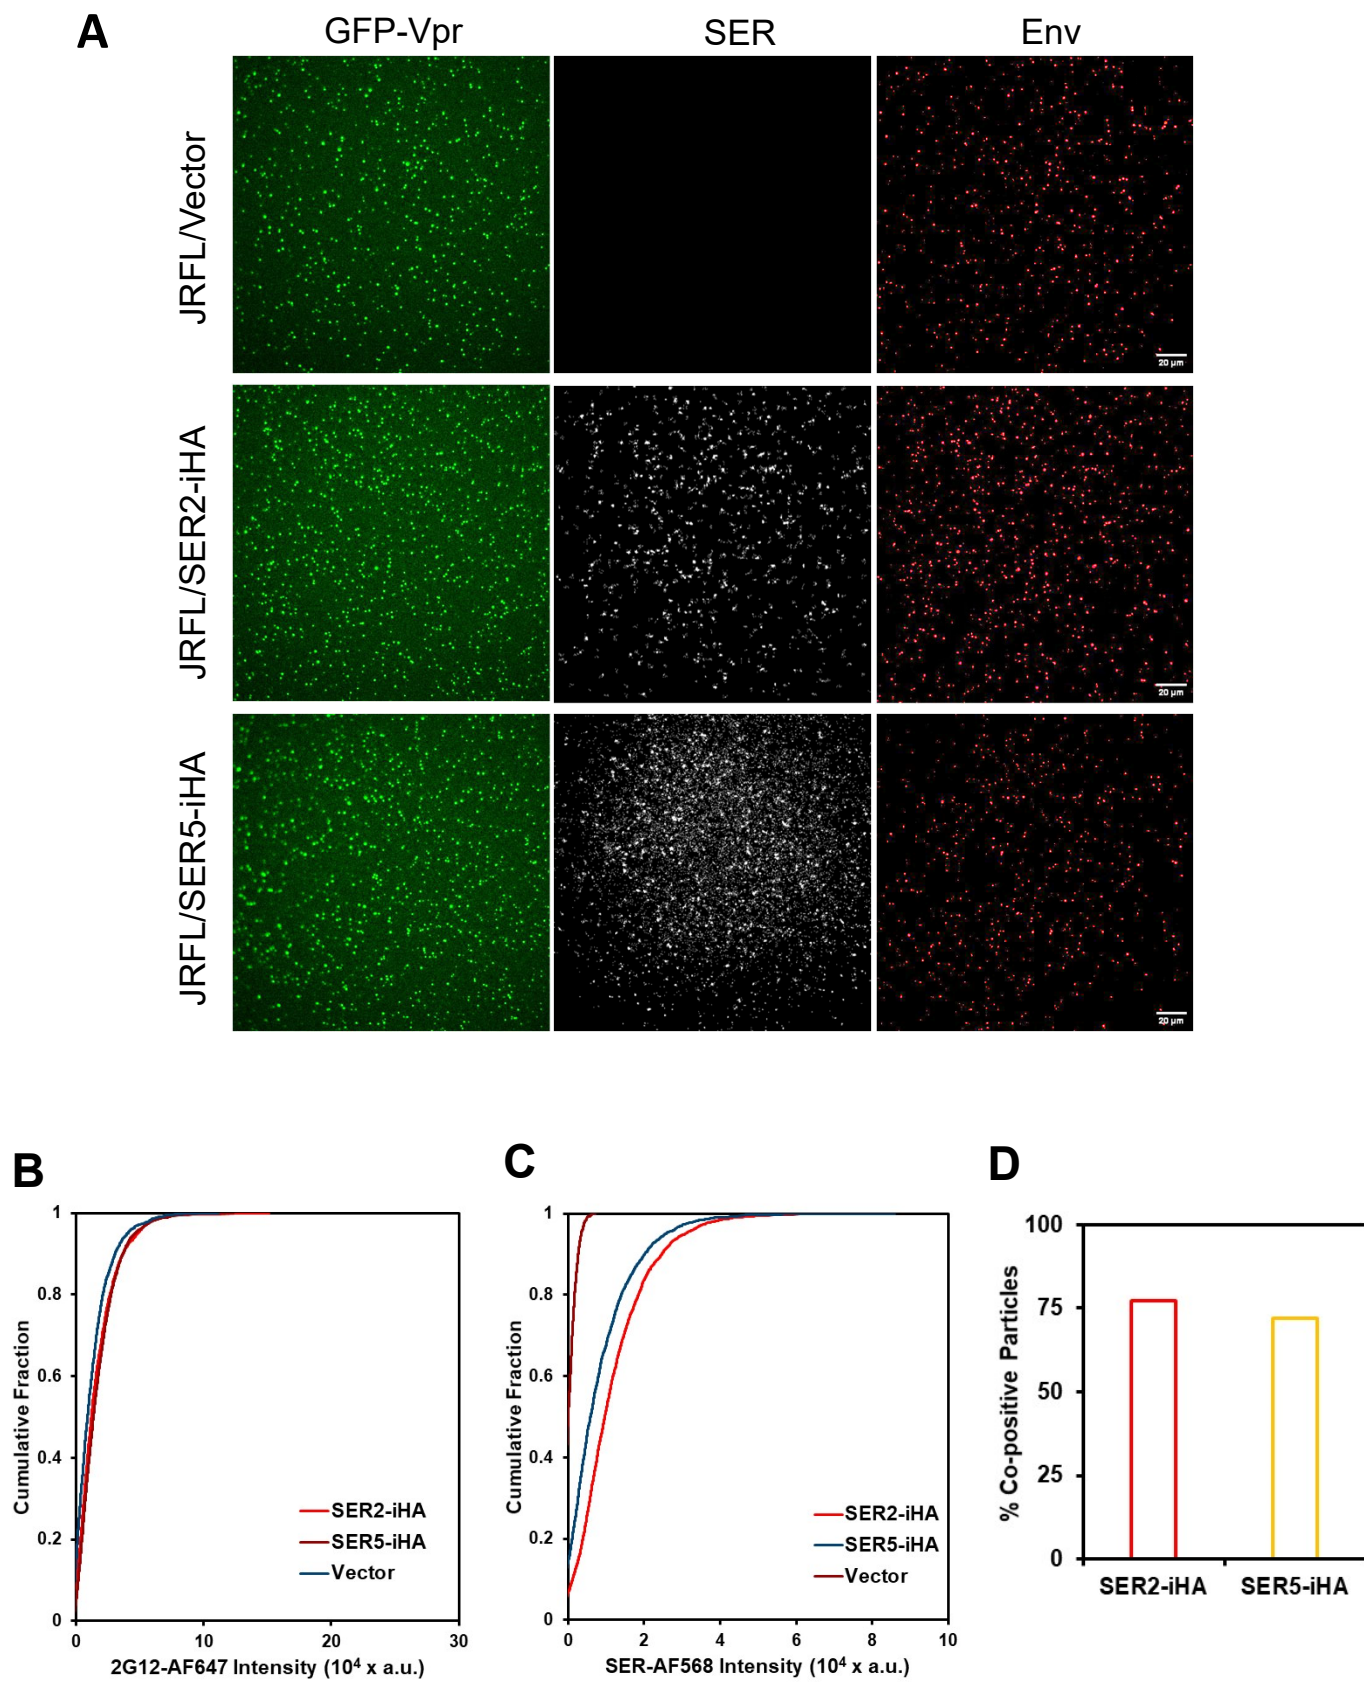

**Figure S2. Characterization of pseudoviruses lacking or containing SER-iHA.** HIV-1 JRFL pseudoviruses labeled with GFP-Vpr and lacking or containing SER2-iHA or SER5-iHA were adhered to poly-D-lysine coated glass chambered coverslips, fixed, and immunostained with anti-gp120 2G12 human (Env) (A, B) and anti-HA (SERINC) mouse (A, C) antibodies, followed by staining with anti-human-AF647 and anti-mouse-CF568 antibodies, respectively. (A) Images of GFP-Vpr containing pseudoviruses stained for Env and SERINC-iHA. (B) Plot of cumulative fraction of fluorescence intensities of particles positive for Env. (C) Plot of cumulative fraction of fluorescence intensities of particles positive for SER-iHA. (D) Co-localization of JRFL Env and SER on viral particles. Around 2,250 single viruses were imaged and analyzed using a custom-written Matlab protocol (B-D).

**Fig. S3**

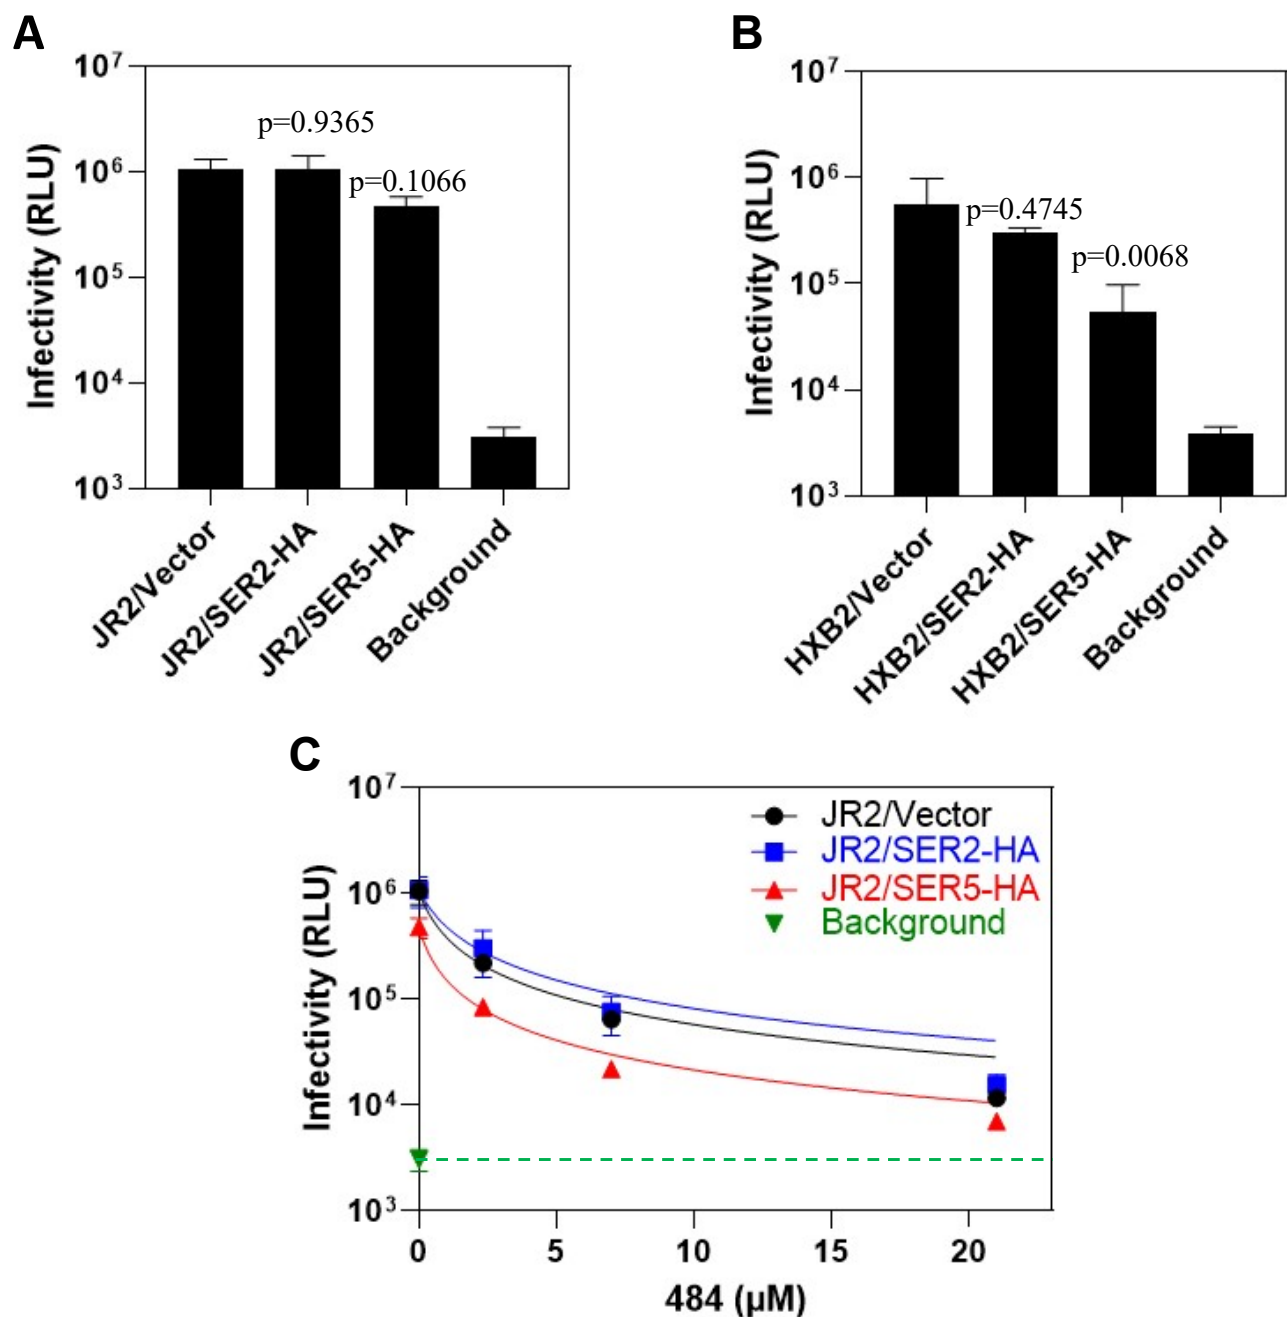

**Figure S3. Raw infectivity data using a luciferase assay for pseudoviruses lacking or containing SER-HA.** This figure is related to main Figure 4. Infectivity in TZM-bl cells plotted as relative light units (RLU) for JR2 (A) and HXB2 (B) pseudoviruses in the absence of **484** compound. Data are means and S.D. of 2 (JR2 pseudoviruses), 3 (HXB2/SER5-HA), and 2 (HXB2/SER2-HA) independent combined experiments, each performed in triplicate. Statistical significance (Student's unpaired t test) is shown above the columns. (C) Raw infectivity data for JR2 pseudoviruses pre-treated with **484**. Data are means and S.D. of 2 independent combined experiments, each performed in triplicate. Green inverted triangle and dashed line indicate the background level. The IC<sub>50</sub> values obtained by curve-fitting and statistical significance are the same as in Fig. 4A.

| n | Env               | T <sub>50</sub> (h) | SD   | p-value (t-test) | T <sub>50</sub> Ratio (Vector/SER5) | T <sub>50</sub> (h) | SD    | p-value (ANOVA RM) | T <sub>50</sub> Ratio (Vector/SER5) | Fold restriction | Phenotype                                                               | Representative experiment                                                             | Combined experiments                                                                  |
|---|-------------------|---------------------|------|------------------|-------------------------------------|---------------------|-------|--------------------|-------------------------------------|------------------|-------------------------------------------------------------------------|---------------------------------------------------------------------------------------|---------------------------------------------------------------------------------------|
| 4 | HXB2/Vector       | 4.7                 | 0.81 |                  | 4 ± 1.3                             | 4.7                 | 0.01  |                    | 4.4 ± 0.2                           | 10.7 ± 0.74      | Tier-1 like                                                             | 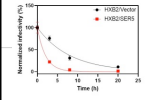   |    |
|   | HXB2/SER5         | 1.2                 | 0.35 | 0.0002           |                                     | 1.1                 | 0.05  | <0.0001            |                                     |                  |                                                                         |                                                                                       |                                                                                       |
| 2 | HXB2/Vector       | 3.3                 | 0.07 |                  | 1.3 ± 0.1                           | 3.3                 | 0.02  |                    | 1.3 ± 0.1                           | 0.6 ± 0.01       | Tier-1 like                                                             |    |    |
|   | HXB2/SER2         | 2.6                 | 0.27 | 0.0711           |                                     | 2.6                 | 0.03  | 0.0851             |                                     |                  |                                                                         |                                                                                       |                                                                                       |
| 2 | HXB2 3.2P/Vector  | 12.7                | 1.65 |                  | 1.8 ± 0.3                           | 12.7                | 0.01  |                    | 1.8 ± 0.01                          | 3.3 ± 0.23       | Resistant to Abs and cold                                               |    |    |
|   | HXB2 3.2P/SER5    | 7.1                 | 0.77 | 0.0494           |                                     | 7.1                 | 0.05  | 0.0373             |                                     |                  |                                                                         |                                                                                       |                                                                                       |
| 3 | ADA/Vector        | 5.1                 | 1.31 |                  | 1.7 ± 0.6                           | 5                   | 0.01  |                    | 1.7 ± 0.01                          | 6.5 ± 0.82       | Tier-1 like                                                             |    |    |
|   | ADA/SER5          | 2.9                 | 0.74 | 0.069            |                                     | 2.9                 | 0.02  | 0.0795             |                                     |                  |                                                                         |                                                                                       |                                                                                       |
| 2 | ADA-V1 alt/Vector | 11.1                | 2.98 |                  | 2.3 ± 0.9                           | 10.4                | 0.01  |                    | 2.3 ± 0.01                          | 6.0 ± 0.52       | N139/I140 deletion, N142S                                               |    |    |
|   | ADA-V1 alt/SER5   | 4.9                 | 1.34 | 0.116            |                                     | 4.4                 | 0.02  | 0.0865             |                                     |                  |                                                                         |                                                                                       |                                                                                       |
| 2 | ADA-N302Y/Vector  | 7.3                 | 0.27 |                  | 2.0 ± 0.3                           | 7.3                 | 0.006 |                    | 2.0 ± 0.01                          | 6.0 ± 0.99       | GP120 V3 Stabilizing                                                    |    |    |
|   | ADA-N302Y/SER5    | 3.7                 | 0.45 | 0.0103           |                                     | 3.7                 | 0.02  | 0.0112             |                                     |                  |                                                                         |                                                                                       |                                                                                       |
| 2 | ADA-R315Q/Vector  | 8.4                 | 0.13 |                  | 1.8 ± 0.4                           | 8.4                 | 0.01  |                    | 1.7 ± 0.005                         | 3.7 ± 0.01       | GP120 V3 Stabilizing                                                    |    |    |
|   | ADA-R315Q/SER5    | 4.8                 | 1.11 | 0.0451           |                                     | 4.8                 | 0.01  | 0.0719             |                                     |                  |                                                                         |                                                                                       |                                                                                       |
| 2 | Comb-mut/Vector   | 14.3                | 5.2  |                  | 1.7 ± 1.1                           | 13.7                | 0.005 |                    | 1.7 ± 0.003                         | 4.7 ± 1.45       | 8 Stabilizing mutations on ADA                                          |   |   |
|   | Comb-mut/SER5     | 8.3                 | 4.4  | 0.3386           |                                     | 8.1                 | 0.01  | 0.3786             |                                     |                  |                                                                         |                                                                                       |                                                                                       |
| 3 | JRFL/Vector       | 12.2                | 1.75 |                  | 1.5 ± 0.2                           | 12.1                | 0.004 |                    | 1.5 ± 0.0                           | 2.6 ± 0.11       | Tier-2 like                                                             |  |  |
|   | JRFL/SER5         | 8.1                 | 0.1  | 0.0153           |                                     | 8.1                 | 0.004 | 0.0205             |                                     |                  |                                                                         |                                                                                       |                                                                                       |
| 2 | JRFL-I423A/Vector | 8.3                 | 0.3  |                  | 1.3 ± 0.1                           | 8.3                 | 0.01  |                    | 1.3 ± 0.0                           | 1.7 ± 0.32       | Induced open structure (β20-β21 sheet)<br>Sensitive to CD4mc, sCD4, Abs |  |  |
|   | JRFL-I423A/SER5   | 6.4                 | 0.5  | 0.0427           |                                     | 6.4                 | 0.01  | 0.0435             |                                     |                  |                                                                         |                                                                                       |                                                                                       |
| 3 | JR2/Vector        | 11.8                | 1.14 |                  | 1.5 ± 0.5                           | 11.8                | 0.006 |                    | 1.5 ± 0.002                         | 2.2 ± 0.45       | Tier-2 like                                                             |  |  |
|   | JR2/SER5          | 7.9                 | 2.3  | 0.0547           |                                     | 7.7                 | 0.01  | 0.0818             |                                     |                  |                                                                         |                                                                                       |                                                                                       |
| 3 | JR2-F673L/Vector  | 12.4                | 2.40 |                  | 1.4 ± 0.5                           | 12.3                | 0.01  |                    | 1.4 ± 0.002                         | 2.4 ± 0.8        | MPER destabilizing                                                      |  |  |
|   | JR2-F673L/SER5    | 8.5                 | 2.17 | 0.1106           |                                     | 8.5                 | 0.01  | 0.1334             |                                     |                  |                                                                         |                                                                                       |                                                                                       |
| 3 | JR2-K683Q/Vector  | 17.7                | 1.4  |                  | 2.9 ± 0.6                           | 17.7                | 0.004 |                    | 2.9 ± 0.006                         | 2.4 ± 0.74       | MPER destabilizing                                                      |  |  |
|   | JR2-K683Q/SER5    | 6                   | 1.2  | 0.0004           |                                     | 6                   | 0.01  | 0.001              |                                     |                  |                                                                         |                                                                                       |                                                                                       |
| 2 | AD8/Vector        | 13.7                | 1.14 |                  | 1.6 ± 0.1                           | 13.7                | 0.003 |                    | 1.6 ± 0.01                          | 2.5 ± 0.24       | Tier-2 like                                                             |  |  |
|   | AD8/SER5          | 8.8                 | 0.5  | 0.0296           |                                     | 8.8                 | 0.005 | 0.0444             |                                     |                  |                                                                         |                                                                                       |                                                                                       |
| 2 | AD8-S375W/Vector  | 14                  | 1.05 |                  | 1.1 ± 0.3                           | 14                  | 0.007 |                    | 1.2 ± 0.001                         | 1.0 ± 0.09       | More CD4-bound-like<br>Exposure of CoR binding site, Cold sensitive     |  |  |
|   | AD8-S375W/SER5    | 12.2                | 3.5  | 0.5548           |                                     | 12.1                | 0.006 | 0.5694             |                                     |                  |                                                                         |                                                                                       |                                                                                       |
| 2 | AD8 H66N/Vector   | 13.5                | 1.68 |                  | 0.9 ± 0.2                           | 12.5                | 0.006 |                    | 0.8 ± 0.0                           | 2.1 ± 0.08       | More closed conformation<br>Cold resistant                              |  |  |
|   | AD8 H66N/SER5     | 14.4                | 3.39 | 0.765            |                                     | 15.8                | 0.004 | 0.1662             |                                     |                  |                                                                         |                                                                                       |                                                                                       |
| 2 | VSV/Vector        | 12.2                | 4.7  |                  | 1.2 ± 0.5                           | 11.9                | 0.01  |                    | 1.1 ± 0.001                         | 2.2 ± 0.82       | non HIV G protein expression                                            |  |  |
|   | VSV/SER5          | 10.5                | 1.2  | 0.6568           |                                     | 10.5                | 0.01  | 0.7187             |                                     |                  |                                                                         |                                                                                       |                                                                                       |

**Table S1. Effect of virion-incorporated SER5 on the rate of infectivity decay of HIV-1 pseudoviruses ( $T_{50}$ ) and on end-point reduction of infectivity (fold-restriction).** SER5-susceptible Env strains are shown in red, while resistant strains, are in black. Fold-restriction is the ratio of infection between control and SER5 containing viruses. The number of independent experiments (n), each performed in triplicate, is listed in the first column. The  $T_{50}$  results were analyzed in two ways. (i) The individual  $T_{50}$  from independent experiments were averaged and statistical analysis was done using the Student's unpaired t test. (ii) The mean of data points from independent experiments and S.D. were plotted and  $T_{50}$  values determined by single-exponential curve fit. Two-way ANOVA repeated measures statistical analysis was done on the raw data (light orange highlighted columns). The phenotypes of Env mutants, as well as representative and combined original data are shown on the right. The significant p-values are listed in blue.

| n | Env              | 484 IC <sub>50</sub><br>( $\mu$ M) | SD   | p-value<br>t-test | IC <sub>50</sub> Ratio<br>(Vector/SER) | 484 IC <sub>50</sub><br>( $\mu$ M) | SD   | p-value<br>SER vs<br>Vector<br>(ANOVA) | p-value<br>SER5 vs<br>SER2<br>(ANOVA) | IC <sub>50</sub> Ratio<br>(Vector/SER) | Fold<br>restriction |
|---|------------------|------------------------------------|------|-------------------|----------------------------------------|------------------------------------|------|----------------------------------------|---------------------------------------|----------------------------------------|---------------------|
| 3 | HXB2/Vector      | 31.0                               | 6.83 |                   |                                        | 30.5                               | 2.38 |                                        |                                       |                                        |                     |
| 2 | HXB2/SER2        | 30.1                               | 7.46 | 0.8985            | 1 $\pm$ 0.3                            | 29.7                               | 2.72 | 0.8578                                 |                                       | 1 $\pm$ 0.1                            | 1 $\pm$ 0.01        |
| 3 | HXB2/SER5        | 14.9                               | 4.96 | 0.0299            | 2.1 $\pm$ 0.8                          | 14.6                               | 2.30 | 0.016                                  | 0.0422                                | 2.1 $\pm$ 0.4                          | 11.6 $\pm$ 1.5      |
| 3 | ADA/Vector       | 11.4                               | 2.72 |                   | 1.6 $\pm$ 0.3                          | 11.1                               | 0.93 |                                        |                                       | 1.7 $\pm$ 0.2                          | 5.5 $\pm$ 2.3       |
|   | ADA/SER5         | 6.9                                | 1.55 | 0.0694            |                                        | 6.7                                | 0.73 | 0.0765                                 |                                       |                                        |                     |
| 2 | HXB2 3.2P/Vector | 17.5                               | 7.85 |                   | 1.9 $\pm$ 1.3                          | 16.2                               | 0.93 |                                        |                                       | 1.9 $\pm$ 0.2                          | 3.3 $\pm$ 2.3       |
|   | HXB2 3.2P/SER5   | 9.0                                | 4.23 | 0.3087            |                                        | 8.3                                | 0.73 | 0.29                                   |                                       |                                        |                     |
| 2 | JR2/Vector       | 0.6                                | 0.09 |                   |                                        | 0.6                                | 0.04 |                                        |                                       |                                        |                     |
|   | JR2/SER2         | 0.8                                | 0.15 | 0.2391            | 0.7 $\pm$ 0.2                          | 0.8                                | 0.07 | 0.2366                                 | 0.0939                                | 0.7 $\pm$ 0.1                          | 1 $\pm$ 0.07        |
|   | JR2/SER5         | 0.5                                | 0.06 | 0.2359            | 1.3 $\pm$ 0.3                          | 0.5                                | 0.03 | 0.2429                                 |                                       | 1.2 $\pm$ 0.1                          | 2.2 $\pm$ 0.08      |
| 2 | AD8/Vector       | 8.9                                | 3.69 |                   | 1.9 $\pm$ 0.8                          | 8.6                                | 1.06 |                                        |                                       | 1.8 $\pm$ 0.2                          | 2.2 $\pm$ 0.6       |
|   | AD8/SER5         | 4.6                                | 0.01 | 0.2438            |                                        | 4.6                                | 0.20 | 0.2024                                 |                                       |                                        |                     |
| 2 | JRFL/Vector      | 0.6                                | 0.08 |                   | 1.3 $\pm$ 0.2                          | 0.6                                | 0.03 |                                        |                                       | 1.3 $\pm$ 0.1                          | 2.6 $\pm$ 0.6       |
|   | JRFL/SER5        | 0.5                                | 0.05 | 0.1828            |                                        | 0.5                                | 0.03 | 0.1685                                 |                                       |                                        |                     |

**Table S2. Effect of virion-incorporated SER5 on sensitivity of HIV-1 Env glycoproteins to 484, a small molecule inhibitor of HIV-1 infection.** SER5-sensitive Env strains are shown in red, whereas resistant strains are shown in black. The IC<sub>50</sub> was calculated using single site binding curve fit. Analysis of the data was done as explained in the legend to Table S1. The significant p-values are listed in blue.
